# Supplementary material for: Mechanical properties of DNA and DNA nanostructures: comparison of atomistic, Martini and oxDNA models
Source: Royal Society of Chemistry journal article supplement (doi:10.1039/d0tb02970j), 2021-01-01
Supplement: d0tb02970j1.pdf [file d0tb02970j1.pdf]

## Supporting Information

### Mechanical properties of DNA and DNA nanostructures: comparison of atomistic, Martini and oxDNA

Supriyo Naskar<sup>1,\*</sup> and Prabal K. Maiti<sup>1,†</sup>

<sup>1</sup>*Center for Condensed Matter Theory, Department of Physics,  
Indian Institute of Science, Bangalore 560012, India*

---

\* supriyo@iisc.ac.in

† maiti@iisc.ac.in

## I. Sequence and structure of dsDNA and DNA nanotube (DNT)

### A. Sequence of dsDNA

TABLE I: Sequences of Different dsDNAs studied in our simulations

| Systems     | Sequence                                                                     |
|-------------|------------------------------------------------------------------------------|
| 12 bp dsDNA | d(CGCGAATTCGCG) <sub>2</sub>                                                 |
| 24 bp dsDNA | d(CGCGATTGCCTAACGGACAGGCAT) <sub>2</sub>                                     |
| 38 bp dsDNA | d(GCCGCGAGGTGTCAGGGATTGCAGCCAGCATCTCGTCG) <sub>2</sub>                       |
| 56 bp dsDNA | d(CGCGATTGCCTAACGGACAGGCATAGACGTCT<br>ATGCCTGTCCGTTAGGCAATCGCG) <sub>2</sub> |

## B. Schematic Diagram of DNT

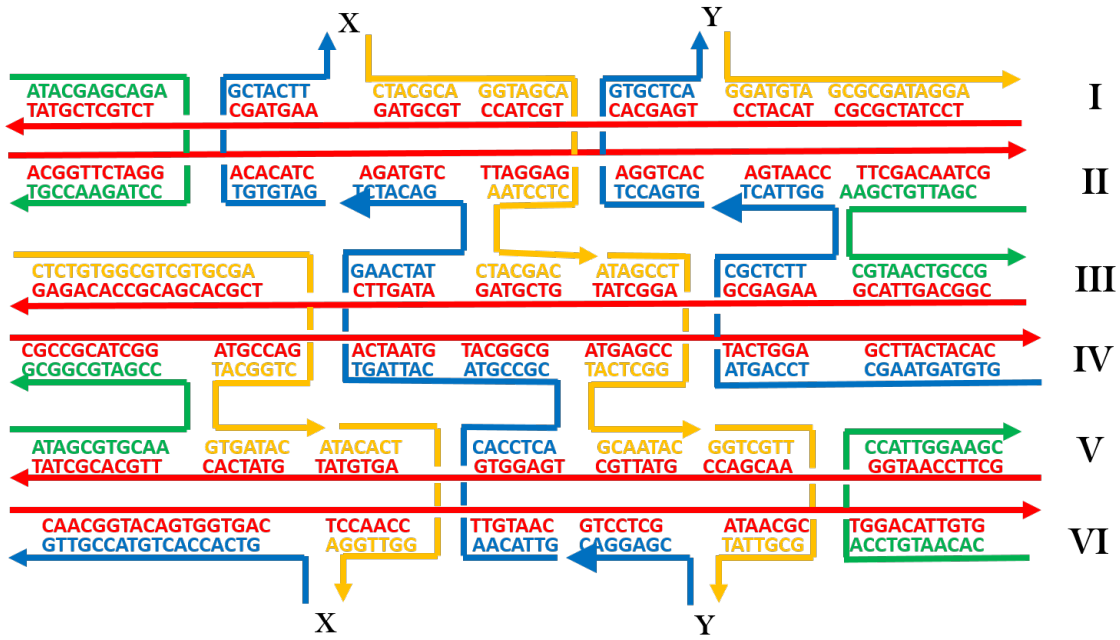

FIG. S1: Schematic Diagram representing the DNT crossovers and sequence. The roman numbers indicating six different dsDNA strands. Different Colors represent different ssDNA strands. The arrows represent the polarity of the DNA from 5' to 3'. The place X and Y are the position where the hexagonal bundle closes.

## II. Final snapshots of the coarse-grained (CG) dsDNA

### A. Soft-Martini

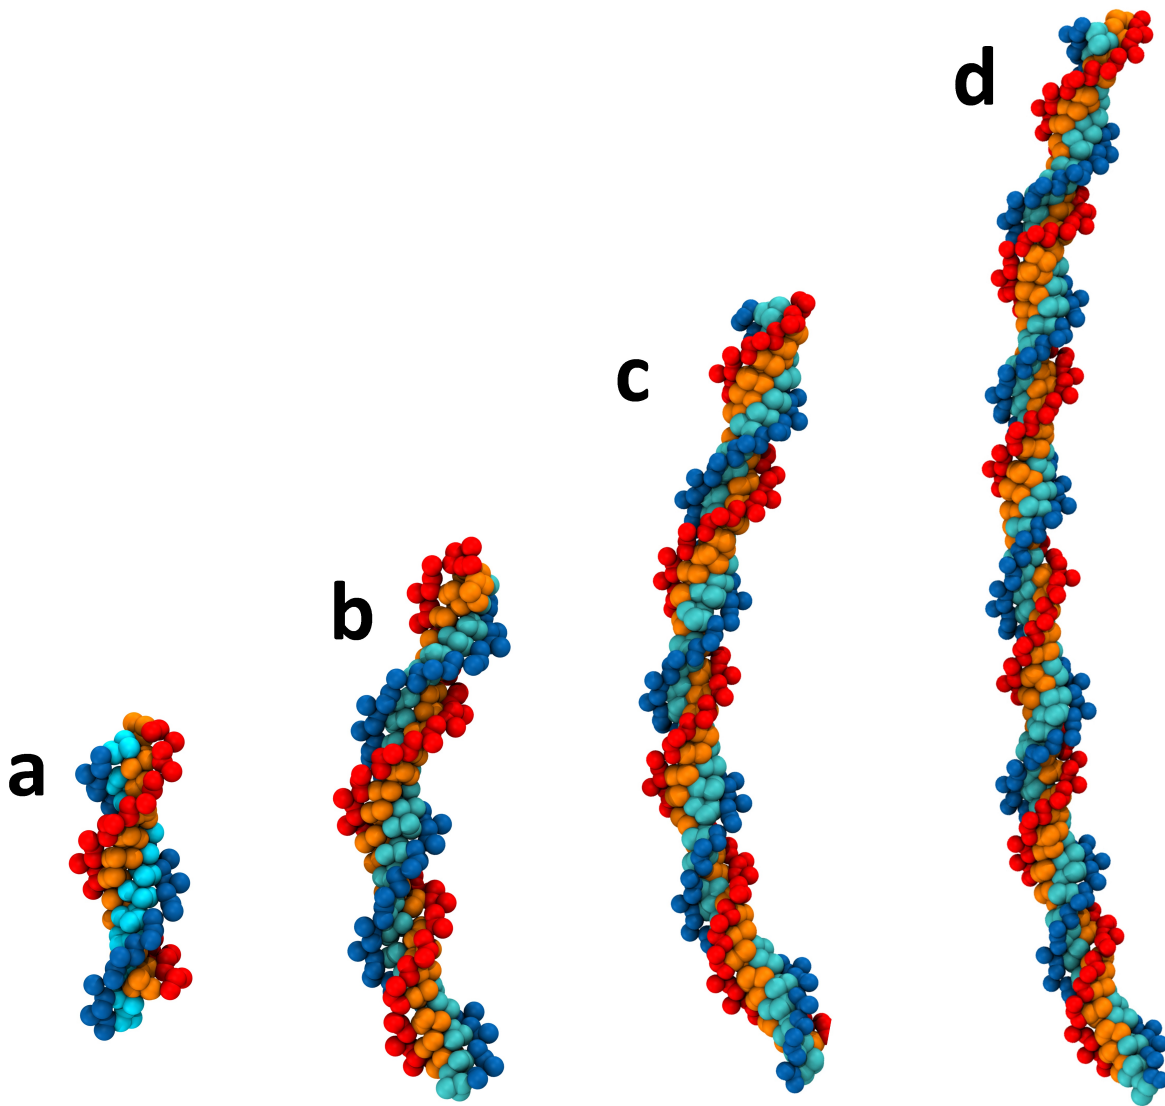

FIG. S2: Final snapshots of the coarse-grained soft-martini dsDNA model after  $2 \mu\text{s}$  long MD simulation. The length of the dsDNA is (a) 12 bp (b) 24 bp (c) 38 bp (d) 56 bp.

## B. Stiff-Martini

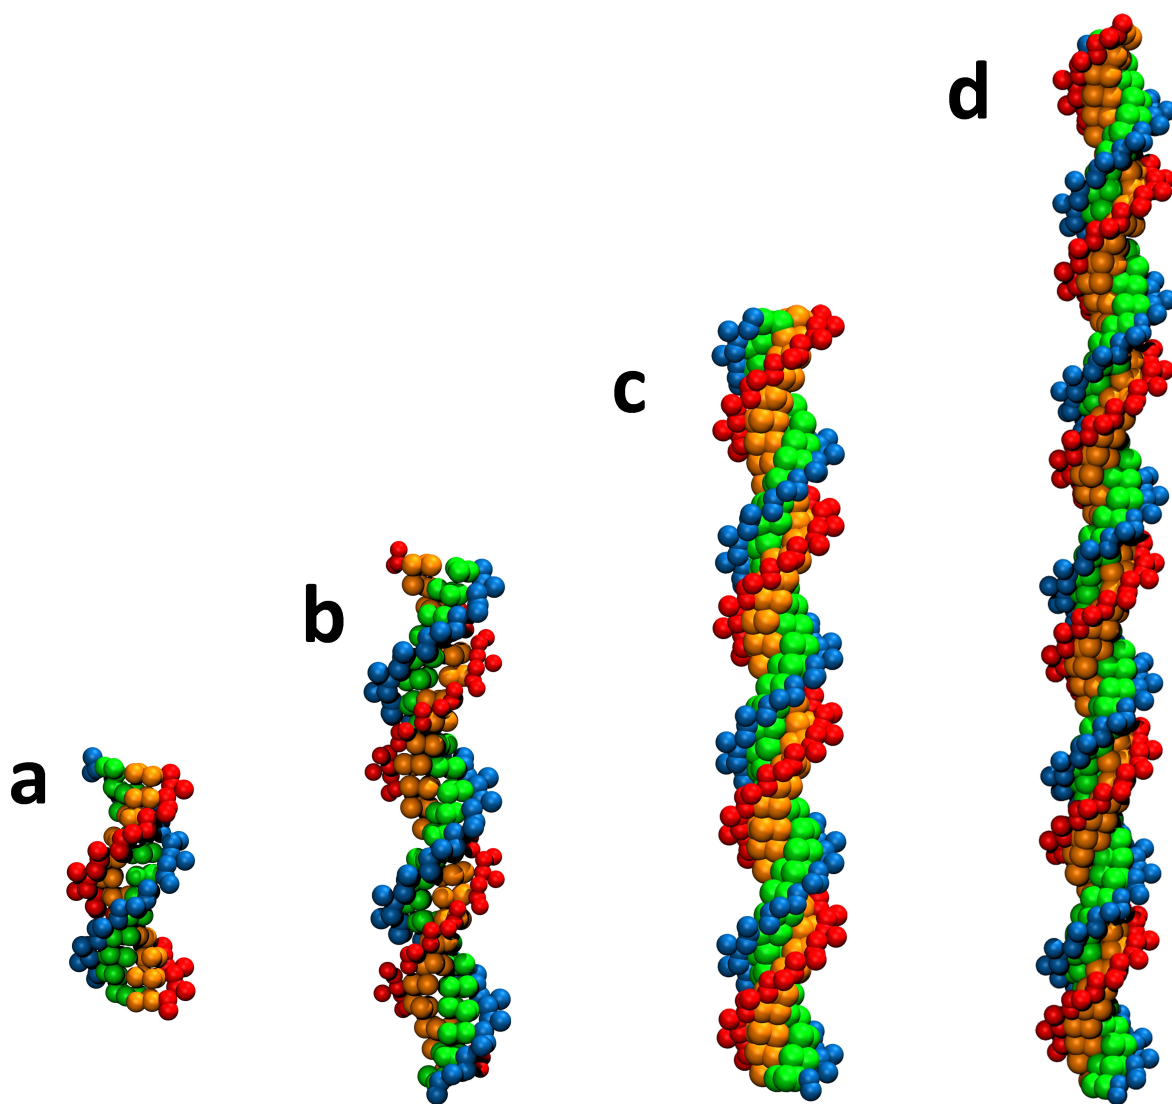

FIG. S3: Final snapshots of the coarse-grained stiff-martini dsDNA model after  $2 \mu\text{s}$  long MD simulation. The length of the dsDNA is (a) 12 bp (b) 24 bp (c) 38 bp (d) 56 bp.

### C. OxDNA

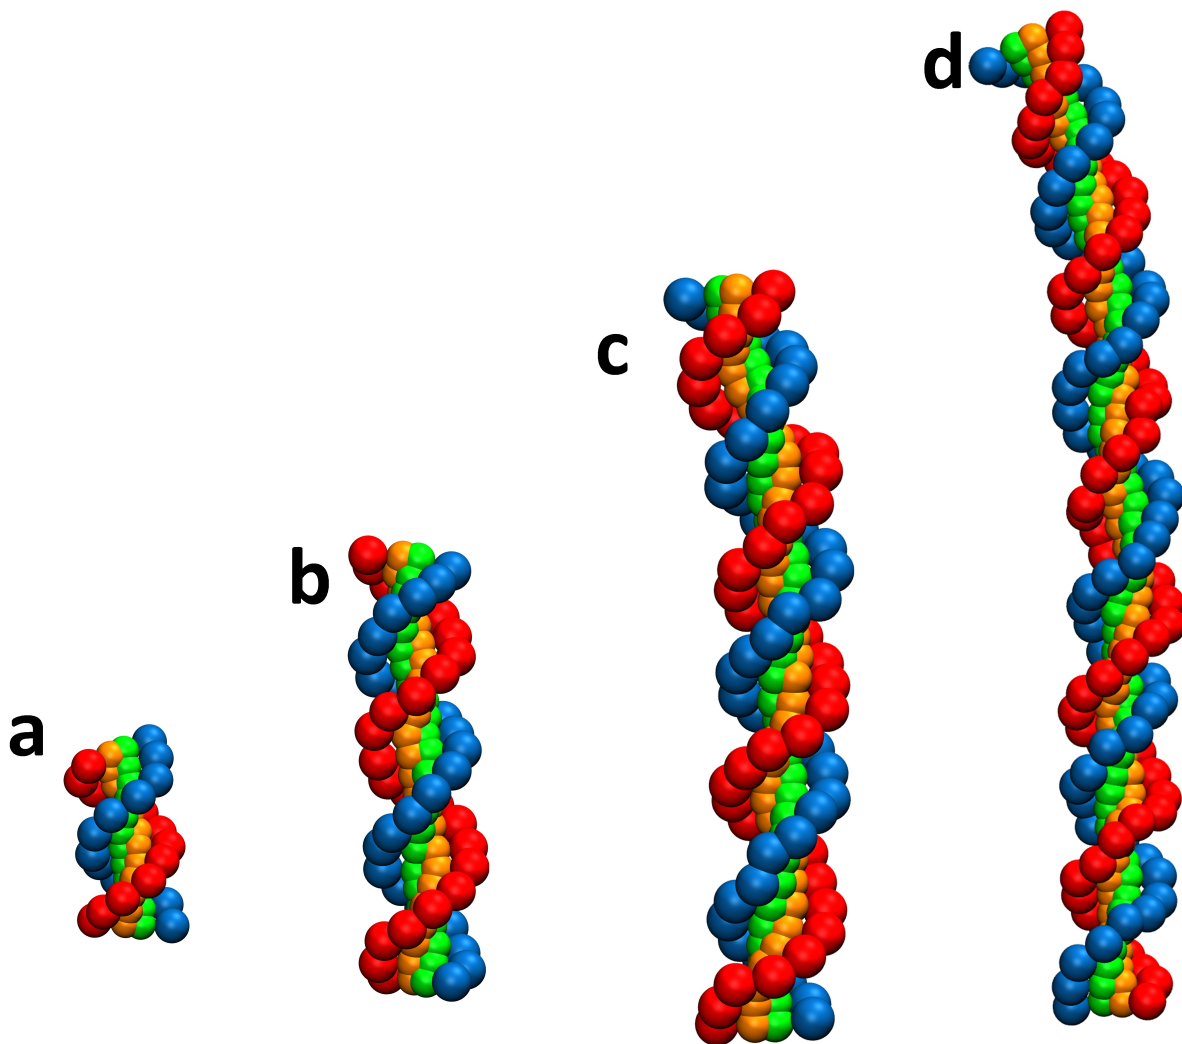

FIG. S4: Final snapshots of the coarse-grained oxDNA dsDNA model after  $2 \times 10^9$  long MD simulation steps. The length of the dsDNA is (a) 12 bp (b) 24 bp (c) 38 bp (d) 56 bp.

### III. Contour length and bending angle distribution of a 12bp dsDNA

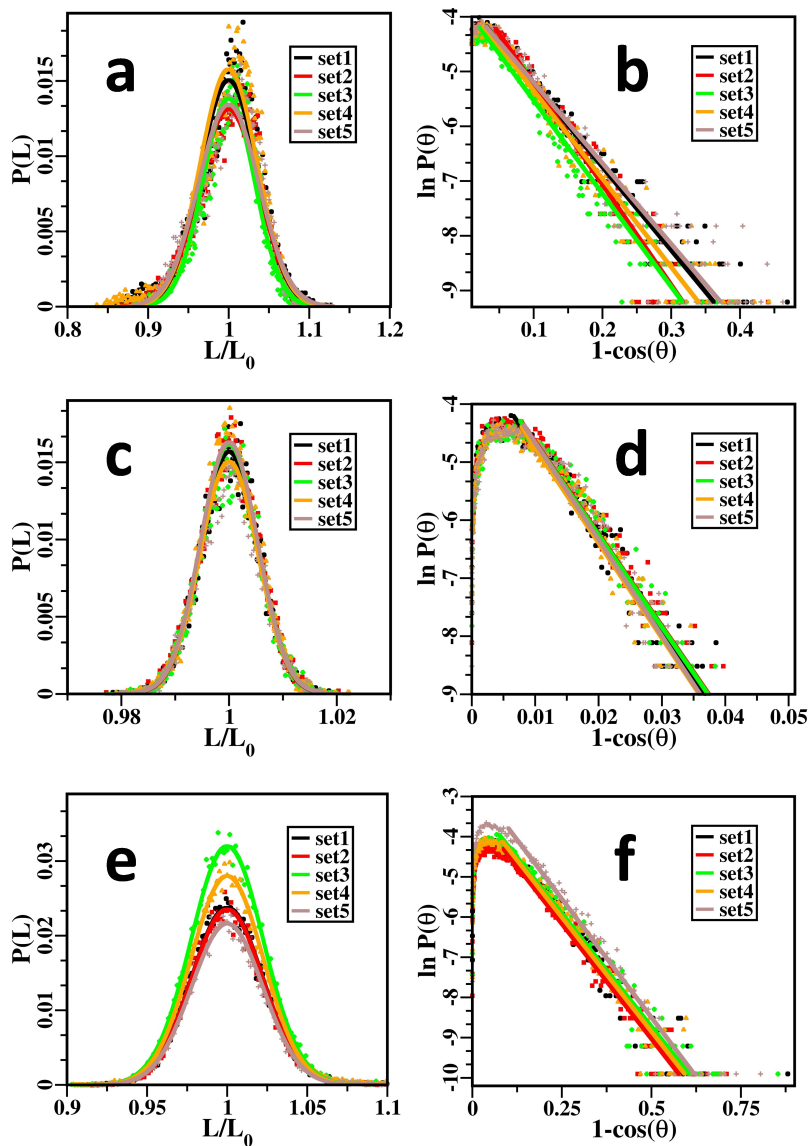

FIG. S5: Contour length distribution and logarithm of bending angle distribution of a 12 bp dsDNA for various CG models. The trajectory is divided into five intervals of equal length and Different sets represent different time interval of the same trajectory. (a) Contour length distribution and (b) logarithm of bending angle distribution of a 12 bp soft martini dsDNA. (c) Contour length distribution and (d) logarithm of bending angle distribution of a 12 bp stiff martini dsDNA. (e) Contour length distribution and (f) logarithm of bending angle distribution of a 12 bp oxDNA.

#### IV. Elastic properties of CG dsDNA

TABLE II: Mechanical properties of soft-martini dsDNA at different salt concentration

| System      | NaCl Salt Concentration | Stretch Modulus (pN) |                      | Persistence length (nm) |                   |
|-------------|-------------------------|----------------------|----------------------|-------------------------|-------------------|
|             |                         | $\gamma_G$           | $\gamma_{WLC}$       | $L_P$                   | $L_P^{WLC}$       |
| 12 bp dsDNA | 0mM                     | 767.16 $\pm$ 85.29   | 1160. $\pm$ 91.69    | 70.03 $\pm$ 5.53        | 25.14 $\pm$ 1.19  |
|             | 150mM                   | 758.10 $\pm$ 63.43   | 1083.18 $\pm$ 178.42 | 65.38 $\pm$ 10.77       | 23.75 $\pm$ 2.00  |
|             | 250mM                   | 750.46 $\pm$ 77.14   | 1117.00 $\pm$ 192.69 | 67.42 $\pm$ 11.63       | 24.73 $\pm$ 2.04  |
| 24 bp dsDNA | 0mM                     | 916.04 $\pm$ 159.80  | 1729.78 $\pm$ 130.23 | 104.40 $\pm$ 7.86       | 29.39 $\pm$ 2.23  |
|             | 150mM                   | 848.18 $\pm$ 409.60  | 973.97 $\pm$ 140.79  | 58.79 $\pm$ 8.50        | 16.94 $\pm$ 6.15  |
|             | 250mM                   | 1028.84 $\pm$ 208.48 | 1563.22 $\pm$ 269.75 | 94.35 $\pm$ 16.28       | 38.09 $\pm$ 30.89 |
| 38 bp dsDNA | 0mM                     | 854.68 $\pm$ 75.21   | 1150.11 $\pm$ 105.08 | 69.42 $\pm$ 6.34        | 29.98 $\pm$ 2.54  |
|             | 150mM                   | 1020.37 $\pm$ 117.91 | 1094.74 $\pm$ 241.57 | 66.07 $\pm$ 14.58       | 29.27 $\pm$ 1.91  |
|             | 250mM                   | 1225.32 $\pm$ 122.33 | 1083.33 $\pm$ 305.68 | 65.39 $\pm$ 18.45       | 29.59 $\pm$ 1.67  |
| 56 bp dsDNA | 0mM                     | 1023.36 $\pm$ 241.80 | 1946.10 $\pm$ 308.86 | 117.46 $\pm$ 18.64      | 51.52 $\pm$ 7.44  |
|             | 150mM                   | 789.30 $\pm$ 183.54  | 1317.08 $\pm$ 635.32 | 116.00 $\pm$ 16.29      | 45.81 $\pm$ 9.73  |
|             | 250mM                   | 1178.63 $\pm$ 244.82 | 1881.61 $\pm$ 124.13 | 113.57 $\pm$ 7.49       | 55.70 $\pm$ 42.07 |

TABLE III: Mechanical properties of stiff-martini dsDNA at 0mM NaCl

| System      | Stretch Modulus (pN)   |                        | Persistence length (nm) |                   |
|-------------|------------------------|------------------------|-------------------------|-------------------|
|             | $\gamma_G$             | $\gamma_{WLC}$         | $L_P$                   | $L_P^{WLC}$       |
| 12 bp dsDNA | 38983.44 $\pm$ 789.02  | 9964.32 $\pm$ 204.59   | 601.42 $\pm$ 12.35      | 102.32 $\pm$ 0.82 |
| 24 bp dsDNA | 47375.90 $\pm$ 2535.07 | 13920.78 $\pm$ 536.98  | 840.22 $\pm$ 32.41      | 200.77 $\pm$ 5.24 |
| 38 bp dsDNA | 50697.57 $\pm$ 1162.17 | 9478.05 $\pm$ 248.87   | 572.07 $\pm$ 15.02      | 280.85 $\pm$ 1.41 |
| 56 bp dsDNA | 51901.02 $\pm$ 416.46  | 18054.48 $\pm$ 2585.72 | 1089.72 $\pm$ 156.07    | 400.25 $\pm$ 7.69 |



TABLE IV: Mechanical properties of oxDNA at different salt concentration

| System      | NaCl Salt Concentration | Stretch Modulus (pN) |                     | Persistence length (nm) |                  |
|-------------|-------------------------|----------------------|---------------------|-------------------------|------------------|
|             |                         | $\gamma_G$           | $\gamma_{WLC}$      | $L_P$                   | $L_P^{WLC}$      |
| 12 bp dsDNA | 0mM                     | $2151.60 \pm 25.77$  | $728.42 \pm 11.91$  | $43.96 \pm 0.72$        | $23.00 \pm 0.14$ |
|             | 150mM                   | $2149.84 \pm 26.43$  | $704.18 \pm 13.07$  | $42.50 \pm 0.79$        | $22.61 \pm 0.21$ |
|             | 250mM                   | $2180.13 \pm 22.67$  | $662.07 \pm 6.15$   | $39.96 \pm 0.37$        | $22.81 \pm 1.74$ |
| 24 bp dsDNA | 0mM                     | $1470.48 \pm 74.31$  | $825.73 \pm 65.87$  | $49.83 \pm 3.98$        | $31.16 \pm 0.56$ |
|             | 150mM                   | $1520.40 \pm 48.68$  | $657.87 \pm 37.86$  | $39.71 \pm 2.28$        | $25.78 \pm 0.30$ |
|             | 250mM                   | $1528.58 \pm 56.27$  | $649.91 \pm 28.96$  | $39.22 \pm 1.75$        | $25.42 \pm 0.27$ |
| 38 bp dsDNA | 0mM                     | $2209.62 \pm 15.99$  | $1268.88 \pm 26.88$ | $76.59 \pm 1.62$        | $52.45 \pm 0.12$ |
|             | 150mM                   | $2288.43 \pm 19.05$  | $941.91 \pm 21.16$  | $56.85 \pm 1.27$        | $34.50 \pm 0.14$ |
|             | 250mM                   | $2313.52 \pm 23.13$  | $909.22 \pm 16.79$  | $54.88 \pm 1.01$        | $33.73 \pm 0.12$ |
| 56 bp dsDNA | 0mM                     | $1398.29 \pm 245.41$ | $1502.17 \pm 43.65$ | $90.67 \pm 2.63$        | $73.45 \pm 1.11$ |
|             | 150mM                   | $2309.68 \pm 62.19$  | $867.50 \pm 28.31$  | $52.36 \pm 1.71$        | $37.21 \pm 0.67$ |
|             | 250mM                   | $2228.92 \pm 58.90$  | $884.10 \pm 30.63$  | $53.36 \pm 1.85$        | $36.78 \pm 0.85$ |

## V. Contour length distribution of DNT

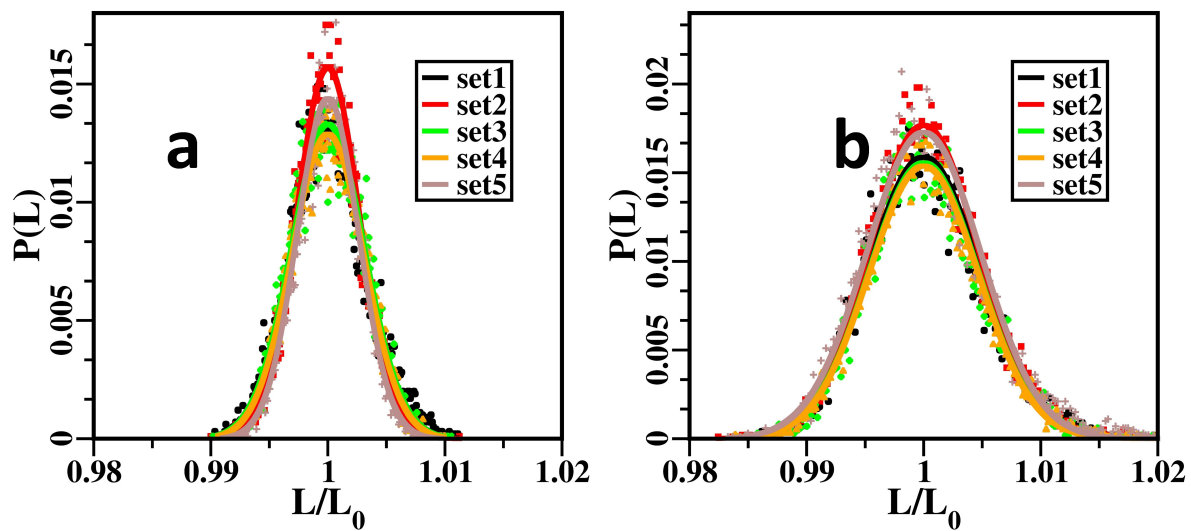

FIG. S6: Contour length distribution of DNT for (a) soft martini (b) oxDNA.

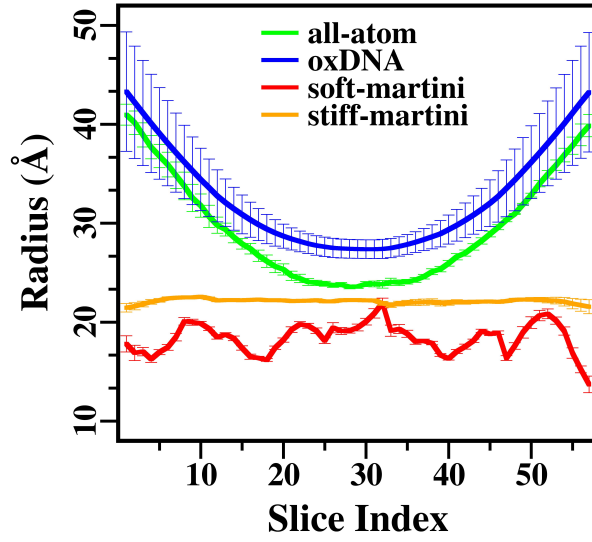

FIG. S7: Radius of the pore of DNTs. The average value of the pore radius is used to estimate area moment of inertia,  $I$  (equation 10 of the main article).

TABLE V: Mechanical properties of DNT.

| Quantity                             | Salt concentration | all-atom             | soft martini           | stiff martini           | oxDNA                |
|--------------------------------------|--------------------|----------------------|------------------------|-------------------------|----------------------|
| Stretch modulus (pN)                 | 0 mM               | $8294.87 \pm 48.19$  | $16799.39 \pm 2684.95$ | $113205.86 \pm 3468.73$ | $9504.72 \pm 340.30$ |
|                                      | 500 mM             | $10540.9 \pm 148.13$ | $16790.09 \pm 4365.83$ | –                       | $8856.86 \pm 121.76$ |
|                                      | 1000 mM            | $13066.8 \pm 155.91$ | $14562.56 \pm 4226.89$ | –                       | $9736.46 \pm 386.64$ |
| Persistence length ( $\mu\text{m}$ ) | 0 mM               | $6.35 \pm 0.11$      | $12.97 \pm 1.8$        | $88.55 \pm 2.71$        | $7.34 \pm 0.26$      |
|                                      | 500 mM             | $8.28 \pm 0.12$      | $12.38 \pm 1.99$       | –                       | $6.84 \pm 0.09$      |
|                                      | 1000 mM            | $10.42 \pm 0.12$     | $11.69 \pm 2.43$       | –                       | $7.52 \pm 0.29$      |
